# Supplementary material for: Can DNA help trace the local trade of pangolins? Conservation genetics of white-bellied pangolins from the Dahomey Gap (West Africa)
Source: PubMed Central journal article supplement (PMC8842964; doi:10.1186/s12862-022-01971-5), 2022-02-14

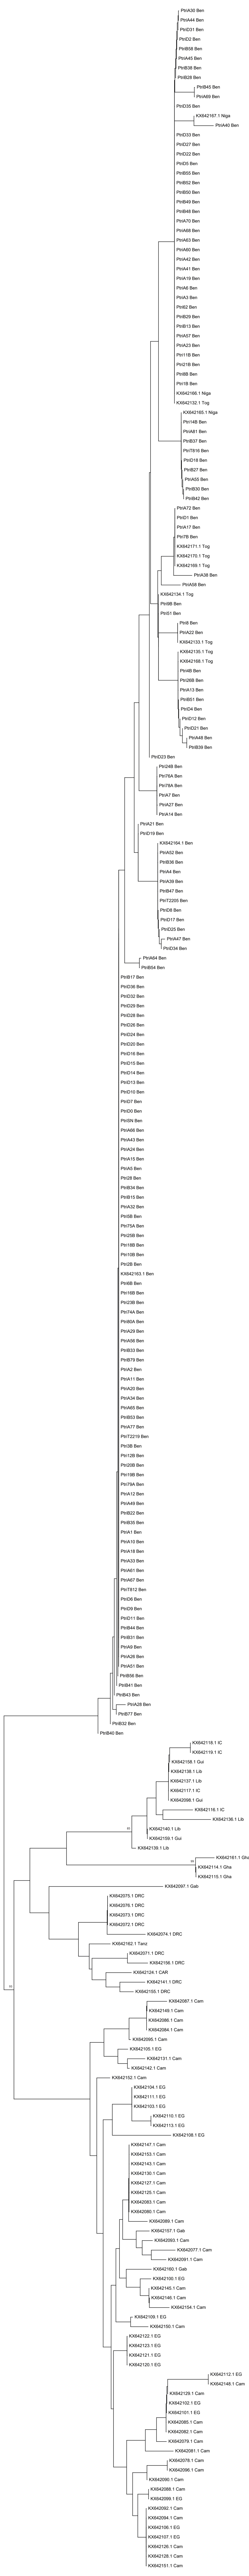

Supplement: 12862_2022_1971_MOESM3_ESM.pdf [file 12862_2022_1971_MOESM3_ESM.pdf]
